# Supplementary material for: Analysis of Culturable Bacterial Diversity of Pangong Tso Lake via a 16S rRNA Tag Sequencing Approach
Source: MDPI journal article supplement (doi:10.3390/microorganisms12020397), 2024-02-17
Supplement: s1 [file s1]

**Table S1. Physico-chemical analysis of Pangong sediment sample.**

| S.No. | Parameters                                 | Pangong sediment | Unit    |
|-------|--------------------------------------------|------------------|---------|
| 1     | Conductivity of sediment <sup>a</sup>      | 1.565            | mmho/cm |
| 2     | Total organic carbon (TOC) <sup>θ</sup>    | 0.122            | %       |
| 3     | Total kjeldahl nitrogen (TKN) <sup>*</sup> | 0.46             | mg/kg   |
| 4     | Total Dissolved Solids (TDS) <sup>ψ</sup>  | 5450             | mg/kg   |
| 5     | Phosphorus <sup>ψ</sup>                    | 11               | mg/kg   |
| 6     | Sulphate <sup>ψ</sup>                      | BDL              | mg/kg   |
| 7     | Ammonical nitrogen <sup>ψ</sup>            | 34               | mg/kg   |
| 8     | Nitrate nitrogen <sup>ψ</sup>              | 5                | mg/kg   |
| 9     | Nitrite (as NO <sub>2</sub> ) <sup>ψ</sup> | 0.20             | mg/kg   |
| 10    | Calcium (as Ca) <sup>ω</sup>               | 3889             | mg/kg   |
| 11    | Magnesium (as Mg) <sup>ω</sup>             | 1287             | mg/kg   |
| 12    | Zn (as Zn) <sup>ω</sup>                    | 28.47            | mg/kg   |
| 13    | Manganese (as Mn) <sup>ω</sup>             | 548.37           | mg/kg   |
| 14    | Iron (as Fe) <sup>ω</sup>                  | 1.47             | %       |
| 15    | Boron (as B) <sup>ω</sup>                  | 71.90            | mg/kg   |
| 16    | Copper (as Cu) <sup>ω</sup>                | 46.66            | mg/kg   |
| 17    | Cobalt ( as Cd) <sup>ω</sup>               | 9.5              | mg/kg   |
| 18    | Molybdenum (as Mo) <sup>ω</sup>            | 0.56             | mg/kg   |
| 19    | Cadmium (Cd) <sup>ω</sup>                  | 0.12             | mg/kg   |
| 20    | Chromium (Cr) <sup>ω</sup>                 | 17.28            | mg/kg   |
| 21    | Aluminium (as Al) <sup>ω</sup>             | 0.58             | %       |
| 22    | Barium <sup>ω</sup>                        | 47.14            | mg/kg   |
| 23    | Nickel (as Ni) <sup>ω</sup>                | 12.98            | mg/kg   |
| 24    | Lead (as Pb) <sup>ω</sup>                  | 5.84             | mg/kg   |
| 25    | Mercury (as Hg) <sup>ω</sup>               | BDL              | mg/kg   |
| 26    | Arsenic (As) <sup>ω</sup>                  | 15.09            | mg/kg   |
| 27    | Chloride (as Cl) <sup>ψ</sup>              | 520              | mg/kg   |
| 28    | Salinity <sup>a</sup>                      | 0.74             | ppt     |
| 29    | Lithium <sup>ω</sup>                       | 14.70            | mg/kg   |
| 30    | Vanadium <sup>ω</sup>                      | 28.80            | mg/kg   |
| 31    | Selenium (as Se) <sup>ω</sup>              | 0.24             | mg/kg   |
| 32    | Silicon (Si) <sup>ω</sup>                  | 400              | mg/kg   |

<sup>a</sup>APHA2510 B, <sup>θ</sup> IS 2720, <sup>\*</sup> AOAC 955.04, <sup>ψ</sup> Baruah & Barthakur, 1998, <sup>ω</sup> AOAC 990.08.
